# Supplementary material for: A Review of Oxylipins in Alzheimer’s Disease and Related Dementias (ADRD): Potential Therapeutic Targets for the Modulation of Vascular Tone and Inflammation
Source: MDPI journal article supplement (doi:10.3390/metabo12090826), 2022-09-01
Supplement: s1 [file s1]

**Supplementary Table S1. Oxylipin names and abbreviations.**

| Abbreviation                                                                                                       | PUFA<br>Derivative | PUFA<br>Type | Enzymatic<br>Pathway   | Name                                                            |
|--------------------------------------------------------------------------------------------------------------------|--------------------|--------------|------------------------|-----------------------------------------------------------------|
| PGA <sub>2</sub> , PGB <sub>2</sub> , PGE <sub>2</sub>                                                             | AA                 | n-6          | COX                    | Series 2 prostaglandin- A, B, E                                 |
| TxA <sub>2</sub> , TxB <sub>2</sub>                                                                                | AA                 | n-6          | COX                    | Series 2 thromboxane- A, B                                      |
| 5-, 8-, 9-,11-,<br>12-, 15-, HpETE                                                                                 | AA                 | n-6          | LOX                    | 5-, 8-, 9-,11-, 12-, 15-hydroxperoxy-<br>eicosatetraenoic acid  |
| 5-, 8-, 9-,11-,<br>12-, 15-, HETE                                                                                  | AA                 | n-6          | LOX                    | 5-, 8-, 9-,11-, 12-, 15-hydroxy-<br>eicosatetraenoic acid,      |
| LTB <sub>4</sub> , LTC <sub>4</sub> , LTD <sub>4</sub> ,<br>LTE <sub>4</sub> , LTF <sub>4</sub> , LxB <sub>4</sub> | AA                 | n-6          | LOX                    | Series 4 Leukotriene- A-F; Series 4<br>Lipoxin- A,B             |
| 5, 6-, 8,9-, 11,12-<br>14,15-, EET                                                                                 | AA                 | n-6          | CYP                    | 5,6-, 8,9-, 11,12,<br>14,15-, epoxy-eicosatrienoic acid         |
| 5,6-, 8,9-, 11,12,<br>14,15-, DHET                                                                                 | AA                 | n-6          | CYP,sEH                | 5,6-, 8,9-, 11,12-, 14,15-dihydroxy-<br>eicosatrienoic acid     |
| 16-,17-,18-,19-,20-HETE                                                                                            | AA                 | n-6          | CYP, ω-<br>hydroxylase | 16-,17-,18-,19-,20--<br>hydroxyeicosatetraenoic acid            |
| 9-HODE, 13-HODE                                                                                                    | LA                 | n-6          | LOX                    | 9-, 13- hydroxy-octadecadienoic acid                            |
| 9,10-, 12,13- EpOME                                                                                                | LA                 | n-6          | CYP                    | 9,10-, 12,13- epoxy-octadecenoic acid                           |
| 9,10-, 12,13- DiHOME                                                                                               | LA                 | n-6          | CYP,sEH                | 9,10-, 12,13- dihydroxy-octadecenoic<br>acid                    |
| PGD <sub>3</sub> , PGE <sub>3</sub><br>PGF <sub>3</sub> , PGJ <sub>3</sub> , TxA <sub>3</sub>                      | EPA                | n-3          | COX                    | Series 3 prostaglandin-, D,E,F, J;<br>Series 3 thromboxane A    |
| 18-HEPE, RvE1-3                                                                                                    | EPA                | n-3          | COX2*                  | 18-hydroxyeicosapentaenoic acid,<br>resolvin E1-E3              |
| 5-, 8-, 9-,11-,<br>12-, 15-, HpEPE                                                                                 | EPA                | n-3          | LOX                    | 5-, 8-, 9-,11-,<br>12-, 15-hydroperoxy-<br>eicosapentanoic acid |
| 5-, 8-, 9-,11-,<br>12-, 15- HEPE                                                                                   | EPA                | n-3          | LOX                    | 5-, 8-, 9-,11-,<br>12-, 15- hydroxyeicosapentaenoic<br>acid     |

|                                                                                                    |     |     |                    |                                                                 |
|----------------------------------------------------------------------------------------------------|-----|-----|--------------------|-----------------------------------------------------------------|
| LTBA <sub>5</sub> , LTB <sub>5</sub> , LTC <sub>5</sub> , LTD <sub>5</sub> , LxA <sub>5</sub> , Lx | EPA | n-3 | LOX                | Series 5 leukotrienes A-D; series 5 Lipoxins A, B               |
| 5,6-, 8,9-, 11,12-,14,15-17,18- EpETE                                                              | EPA | n-3 | CYP                | 5,6-, 8,9-, 11,12-,14,15-17,18- epoxy-eicosatetraenoic acid     |
| 5,6-, 8,9-, 11,12-,14,15-17,18- DiHETE                                                             | EPA | n-3 | CYP,sEH            | 5,6-, 8,9-, 11,12-,14,15-17,18- dihydroxy-eicosatetraenoic acid |
| RvD1-4                                                                                             | DHA | n-3 | COX2*              | Resolvin D1-4                                                   |
| Mar, PD, Rv                                                                                        | DHA | n-3 | LOX                | Maresins, Protectins, Resolvins                                 |
| 4-,7-,8-,10-,11-,13-HDoHE                                                                          | DHA | n-3 | LOX                | 4-,7-,8-,10-,11-,13-hydroxydocosaheptaenoic acid                |
| 7,8-, 10-11, 13,14-16,17-,19,20- EpDPE                                                             | DHA | n-3 | CYP                | 7,8-,10-11, 13,14-16,17-,19,20- epoxy-docosapentaenoic acid     |
| 7,8-, 10-11, 13,14-16,17-,19,20- DiHDPA                                                            | DHA | n-3 | CYP,sEH            | 7,8-,10-11, 13,14-16,17-,19,20- dihydroxy-docosapentaenoic acid |
| 20-,21-,22-HDoHE                                                                                   | DHA | n-3 | CYP, ω-hydroxylase | 20-,21-,22-hydroxydocosa-hexaenoic acid                         |

---

AA, arachidonic acid; LA, linoleic acid; EPA, eicosapentaenoic acid; DHA, docosaheptaenoic acid; n-6, omega-6; PUFA, n-3, omega-3 PUFA; COX,cyclooxygenase, \*COX2, aspirin-acetylated cyclooxygenase 2; LOX, lipoxygenase; CYP, cytochrome P450; sEH, soluble epoxide hydrolase.
